# Supplementary material for: What Can Eye Movements Tell Us about Reading in a Second Language: A Scoping Review of the Literature
Source: MDPI journal article supplement (doi:10.3390/educsci14040375), 2024-04-04
Supplement: s1 [file s1]

## Supplemental Materials.

We used the Assessment of Study Quality (ASQ) Tool to evaluate the quality of the accepted studies.

[https://www.edu-](https://www.edu-links.org/sites/default/files/media/file/USAID_Office_of_Education_EvaluationQualityAssessmentTool_Dec2017_FINAL.pdf)

[links.org/sites/default/files/media/file/USAID\\_Office\\_of\\_Education\\_EvaluationQualityAssessmentTool\\_Dec2017\\_FINAL.pdf](https://www.edu-links.org/sites/default/files/media/file/USAID_Office_of_Education_EvaluationQualityAssessmentTool_Dec2017_FINAL.pdf)

**Table S1.** *Reliability of the accepted studies.*

| Article        | Conceptual Framing  | **Robustness of methodology | Validity            | Reliability         | *Openness/transparency |
|----------------|---------------------|-----------------------------|---------------------|---------------------|------------------------|
|                | <i>Max Score: 4</i> | <i>Max Score: 3</i>         | <i>Max Score: 4</i> | <i>Max Score: 2</i> | <i>Max Score: 2</i>    |
| Alzhami 2019   | 4                   | 2.5                         | 3                   | 1                   | 2                      |
| Bordag 2021    | 4                   | 3                           | 4                   | 2                   | 2                      |
| Bosma 2020     | 4                   | 3                           | 4                   | 2                   | 2                      |
| Brothers 2021  | 4                   | 3                           | 4                   | 2                   | 2                      |
| Cheng 2021     | 4                   | 3                           | 4                   | 2                   | 2                      |
| Clahsen 2012   | 4                   | 3                           | 4                   | 2                   | 2                      |
| Conklin 2020   | 4                   | 3                           | 4                   | 2                   | 2                      |
| Cui 2023       | 4                   | 3                           | 3                   | 3.5                 | 2                      |
| Demareva 2022  | 4                   | 2                           | 4                   | 2                   | 1                      |
| Dirix 2017     | 4                   | 3                           | 4                   | 1                   | 1                      |
| Egan 2019      | 4                   | 3                           | 4                   | 2                   | 2                      |
| Friesen 2007   | 4                   | 2.5                         | 4                   | 2                   | 2                      |
| Fujita 2021    | 4                   | 3                           | 4                   | 2                   | 2                      |
| Hoverston 2016 | 4                   | 2.5                         | 4                   | 2                   | 2                      |
| Maie 2021      | 4                   | 3                           | 4                   | 2                   | 2                      |
| Martin 2021    | 4                   | 3                           | 4                   | 2                   | 2                      |
| Morr 2022      | 4                   | 3                           | 4                   | 2                   | 2                      |
| Nakamura 2022  | 4                   | 2.5                         | 3.5                 | 1                   | 2                      |
| Nisbet 2022    | 4                   | 2.5                         | 4                   | 2                   | 2                      |
| Parishina 2021 | 4                   | 2.5                         | 4                   | 2                   | 2                      |
| Parishina 2022 | 4                   | 2.5                         | 3.5                 | 2                   | 2                      |
| Patterson 2014 | 4                   | 3                           | 4                   | 2                   | 2                      |
| Rodriguez 2016 | 4                   | 3                           | 4                   | 2                   | 2                      |
| Sagarra 2022   | 4                   | 3                           | 4                   | 1                   | 2                      |
| Sui 2022       | 4                   | 3                           | 4                   | 2                   | 2                      |
| Taylor 2023    | 4                   | 2.5                         | 4                   | 2                   | 2                      |
| Whitford 2012  | 4                   | 2.5                         | 4                   | 2                   | 2                      |
| Whitford 2015  | 4                   | 3                           | 3                   | 4                   | 1                      |
| Whitford 2016  | 4                   | 3                           | 4                   | 2                   | 2                      |
| Whitford 2017  | 4                   | 3                           | 4                   | 2                   | 2                      |
| Whitford 2018  | 4                   | 3                           | 4                   | 2                   | 2                      |
| Whitford 2019  | 4                   | 3                           | 4                   | 2                   | 2                      |
| Whitford 2021  | 4                   | 3                           | 4                   | 2                   | 1                      |
| Winksel 2009   | 4                   | 2.5                         | 4                   | 2                   | 1                      |
| Xiao 2023      | 4                   | 3                           | 4                   | 2                   | 2                      |
